# Supplementary material
Source: PubMed Central journal article supplement (PMC3858422)
Supplement: NIHMS510814-supplement-supplement_1.pdf [file NIHMS510814-supplement-supplement_1.pdf]

**Supplementary Table 1 Factor loadings of the TFEQ-R18 items<sup>a</sup>. Loadings <0.35 are left blank.**

| Item                                                                                                                                      | Women               |                  |                    | Men                 |                  |                     |
|-------------------------------------------------------------------------------------------------------------------------------------------|---------------------|------------------|--------------------|---------------------|------------------|---------------------|
|                                                                                                                                           | Uncontrolled Eating | Emotional Eating | Cognitive Restrain | Uncontrolled Eating | Emotional Eating | Cognitive Restraint |
| I get so hungry that my stomach often seems like a bottomless pit                                                                         | <b>0.77</b>         |                  |                    | <b>0.73</b>         |                  |                     |
| I am always hungry so it is hard for me to stop eating before I finish the food on my plate                                               | <b>0.78</b>         |                  |                    | <b>0.76</b>         |                  |                     |
| Sometimes when I start eating, I just can't seem to stop                                                                                  | <b>0.71</b>         |                  |                    | <b>0.70</b>         |                  |                     |
| I am always hungry enough to eat at any time                                                                                              | <b>0.69</b>         |                  |                    | <b>0.72</b>         |                  |                     |
| When I see a real delicacy, I often get so hungry that I have to eat right away                                                           | <b>0.69</b>         |                  |                    | <b>0.68</b>         |                  |                     |
| Being with someone who is eating often makes me hungry enough to eat also                                                                 | <b>0.64</b>         |                  |                    | <b>0.66</b>         |                  |                     |
| When I smell a sizzling steak or a juicy piece of meat, I find it very difficult to keep from eating, even if I have just finished a meal | <b>0.63</b>         |                  |                    | <b>0.58</b>         |                  |                     |
| How often do you feel hungry?                                                                                                             | <b>0.36</b>         | 0.38             |                    | <b>0.46</b>         |                  |                     |
| When I feel blue, I often overeat.                                                                                                        |                     | <b>0.86</b>      |                    | 0.36                | <b>0.86</b>      |                     |
| When I feel anxious, I find myself eating                                                                                                 |                     | <b>0.85</b>      |                    |                     | <b>0.82</b>      |                     |
| When I feel lonely, I console myself by eating                                                                                            |                     | <b>0.83</b>      |                    | 0.35                | <b>0.83</b>      |                     |
| Do you go on eating binges though you are not hungry?                                                                                     | <b>0.43</b>         | 0.57             |                    | <b>0.44</b>         | 0.47             |                     |
| I consciously hold back at meals in order not to gain weight.                                                                             |                     |                  | <b>0.82</b>        |                     |                  | <b>0.85</b>         |
| I deliberately take small helpings as means of controlling my weight.                                                                     |                     |                  | <b>0.80</b>        |                     |                  | <b>0.79</b>         |
| I do not eat some foods because they make me fat.                                                                                         |                     |                  | <b>0.72</b>        |                     |                  | <b>0.73</b>         |
| How likely are you to consciously eat less than you want?                                                                                 |                     |                  | <b>0.70</b>        |                     |                  | <b>0.70</b>         |
| On a scale of 1 to 8, where 1 means no restraint in eating and 8 means total restraint, what number would you give yourself?              |                     |                  | <b>0.66</b>        |                     |                  | <b>0.64</b>         |
| How frequently do you avoid 'stocking up' on tempting foods?                                                                              |                     |                  | <b>0.51</b>        |                     |                  | <b>0.46</b>         |

<sup>a</sup>Item values in bold represent those contributing to the eating behavior score in the corresponding column. The TFEQ-18 behaviors of 'cognitive restraint' (6 items), 'emotional eating' (3 items) and 'uncontrolled eating' (9 items) correspond to the original 51-item TFEQ behaviors of 'cognitive restraint' (21 items), 'disinhibition' (16 items) and 'hunger' (14 items), respectively.

**Supplementary Table 2 SNP quality matrices by GWAS-set**

| SNP        | Closest Gene               | Chr | Effect/<br>Other | Men  |      |      |      | Women |      |       |      |      |
|------------|----------------------------|-----|------------------|------|------|------|------|-------|------|-------|------|------|
|            |                            |     |                  | EAF  | T2D  | CHD  | KS   | EAF   | T2D  | CHD   | KS   | BrC  |
|            |                            |     |                  |      | Rsq  | Rsq  | Rsq  |       | Rsq  | Rsq   | Rsq  |      |
| rs543874   | <i>SEC16B</i>              | 1   | G/A              | 0.19 | 1.00 | 1    | 1    | 0.19  | 1.00 | 1     | 1    | 0.99 |
| rs1514175  | <i>TNNI3K</i>              | 1   | A/G              | 0.40 | 1    | 1    | 1    | 0.41  | 1    | 1     | 1    | 1    |
| rs1555543  | <i>PTBP2</i>               | 1   | C/A              | 0.56 | 1    | 1    | 1    | 0.58  | 1    | 1     | 1    | 1    |
| rs2815752  | <i>NEGR1</i>               | 1   | A/G              | 0.64 | 1    | 1    | 1    | 0.61  | 1    | 1     | 1    | 1    |
| rs2890652  | <i>LRP1B</i>               | 2   | C/T              | 0.15 | 1.00 | 0.99 | 0.98 | 0.16  | 0.99 | 0.99  | 0.98 | 0.98 |
| rs887912   | <i>FANCL</i>               | 2   | T/C              | 0.31 | 0.99 | 0.99 | 1.00 | 0.30  | 0.99 | 0.99  | 0.99 | 0.99 |
| rs713586   | <i>RBJ/POMC/ADCY3</i>      | 2   | C/T              | 0.48 | 1.00 | 1.00 | 1.00 | 0.47  | 1.00 | 1.00  | 1.00 | 1.00 |
| rs2867125  | <i>TMEM18</i>              | 2   | C/T              | 0.81 | 1.00 | 1.00 | 1.00 | 0.82  | 1.00 | 1.00  | 1.00 | 1.00 |
| rs13078807 | <i>CADM2</i>               | 3   | G/A              | 0.21 | 0.98 | 0.98 | 1.00 | 0.21  | 0.98 | 0.98  | 1.00 | 1.00 |
| rs9816226  | <i>ETV5</i>                | 3   | T/A              | 0.82 | 0.97 | 0.97 | 0.95 | 0.81  | 0.97 | 0.98  | 0.95 | 0.97 |
| rs13107325 | <i>SLC39A8</i>             | 4   | T/C              | 0.08 | 0.70 | 0.99 | 1.00 | 0.08  | 0.67 | 0.99  | 1.00 | 1.00 |
| rs10938397 | <i>GNPDA2</i>              | 4   | G/A              | 0.43 | 0.98 | 0.99 | 0.98 | 0.44  | 0.98 | 0.99  | 0.98 | 0.98 |
| rs4836133  | <i>ZNF608</i>              | 5   | A/C              | 0.50 | 0.93 | 0.93 | 0.94 | 0.49  | 0.94 | 0.95  | 0.94 | 0.94 |
| rs2112347  | <i>POC5</i>                | 5   | T/G              | 0.64 | 0.98 | 0.96 | 0.97 | 0.63  | 0.97 | 0.98  | 0.97 | 0.96 |
| rs987237   | <i>TFAP2B</i>              | 6   | G/A              | 0.19 | 1.00 | 1.00 | 1.00 | 0.18  | 1.00 | 1.00  | 1.00 | 1.00 |
| rs206936   | <i>NUDT3/HMGA1</i>         | 6   | G/A              | 0.21 | 1.00 | 1.00 | 0.99 | 0.20  | 1.00 | 1.00  | 0.99 | 0.99 |
| rs10968576 | <i>LRRN6C</i>              | 9   | G/A              | 0.31 | 1.00 | 1.00 | 1.00 | 0.30  | 1.00 | 1.00  | 1.00 | 1.00 |
| rs3817334  | <i>MTCH2/NDUFS3/CUGBP1</i> | 11  | T/C              | 0.41 | 1.00 | 1.00 | 1.00 | 0.41  | 1.00 | 1.00  | 1.00 | 1.00 |
| rs4929949  | <i>STK33/TUB</i>           | 11  | C/T              | 0.48 | 0.98 | 0.98 | 0.97 | 0.51  | 0.98 | 0.98  | 0.97 | 0.96 |
| rs10767664 | <i>BDNF</i>                | 11  | A/T              | 0.78 | 1.00 | 1.00 | 0.99 | 0.77  | 1.00 | 1.00  | 0.99 | 0.99 |
| rs7138803  | <i>FAIM2</i>               | 12  | A/G              | 0.39 | 1.00 | 1.00 | 1.00 | 0.38  | 1.00 | 1.00  | 1.00 | 1.00 |
| rs4771122  | <i>MTIF3/GTF3A</i>         | 13  | G/A              | 0.20 | 0.95 | 0.95 | 0.93 | 0.23  | 0.96 | 0.96  | 0.93 | 0.93 |
| rs11847697 | <i>PRKD1</i>               | 14  | T/C              | 0.04 | 0.76 | 0.81 | 0.92 | 0.05  | 0.80 | 0.80  | 0.92 | 0.92 |
| rs10150332 | <i>NRXN3</i>               | 14  | C/T              | 0.20 | 1.00 | 1.00 | 1.00 | 0.22  | 0.99 | 1.00  | 1.00 | 1.00 |
| rs2241423  | <i>MAP2K5/LBXCOR1</i>      | 15  | G/A              | 0.75 | 1.00 | 1.00 | 1.00 | 0.77  | 1.00 | 1.00  | 1.00 | 1.00 |
| rs7359397  | <i>SH2B1</i>               | 16  | T/C              | 0.37 | 0.96 | 0.97 | 1.00 | 0.39  | 0.97 | 0.98  | 1.00 | 1.00 |
| rs1558902  | <i>FTO</i>                 | 16  | A/T              | 0.43 | 1.00 | 1.00 | 0.99 | 0.41  | 1.00 | 1.00  | 0.99 | 0.99 |
| rs12444979 | <i>GPRC5B/IQCK</i>         | 16  | C/T              | 0.87 | 0.98 | 0.98 | 0.99 | 0.85  | 0.99 | 0.98  | 1.00 | 1.00 |
| rs571312   | <i>MC4R</i>                | 18  | A/C              | 0.23 | 0.99 | 1.00 | 1.00 | 0.23  | 1.00 | 1.00  | 1.00 | 1.00 |
| rs29941    | <i>KCTD15</i>              | 19  | G/A              | 0.67 | 0.99 | 0.99 | 1.00 | 0.68  | 0.99 | 1.00  | 1.00 | 1.00 |
| rs3810291  | <i>TMEM160/ZC3H4</i>       | 19  | A/G              | 0.67 | 0.70 | 0.71 | 0.71 | 0.69  | 0.72 | 0.731 | 0.71 | 0.66 |
| rs2287019  | <i>QPCTL/GIPR</i>          | 19  | C/T              | 0.82 | 0.60 | 0.54 | 1.00 | 0.83  | 0.58 | 0.51  | 1.00 | 1.00 |

**Supplementary Table 3 Power estimates for individual-SNP analyses<sup>a</sup>**

| SNP        | MAF  | Effect (SE) | Power, %      |                 |
|------------|------|-------------|---------------|-----------------|
|            |      |             | $\alpha=0.05$ | $\alpha=0.0016$ |
| rs1558902  | 0.42 | 0.39 (0.02) | 99            | 86              |
| rs2867125  | 0.17 | 0.31 (0.03) | 72            | 27              |
| rs571312   | 0.24 | 0.23 (0.03) | 56            | 16              |
| rs10938397 | 0.43 | 0.18 (0.02) | 50            | 12              |
| rs543874   | 0.19 | 0.22 (0.03) | 47            | 10              |
| rs10767664 | 0.22 | 0.19 (0.03) | 41            | 8               |
| rs7359397  | 0.4  | 0.15 (0.02) | 36            | 6               |
| rs713586   | 0.47 | 0.14 (0.02) | 34            | 5               |
| rs2815752  | 0.39 | 0.13 (0.02) | 29            | 4               |
| rs2287019  | 0.2  | 0.15 (0.03) | 26            | 3               |
| rs7138803  | 0.38 | 0.12 (0.02) | 25            | 3               |
| rs12444979 | 0.13 | 0.17 (0.03) | 24            | 3               |
| rs9816226  | 0.18 | 0.14 (0.03) | 22            | 2               |
| rs2241423  | 0.22 | 0.13 (0.02) | 22            | 2               |
| rs10150332 | 0.21 | 0.13 (0.03) | 21            | 2               |
| rs10968576 | 0.31 | 0.11 (0.02) | 20            | 2               |
| rs13107325 | 0.07 | 0.19 (0.04) | 19            | 2               |
| rs987237   | 0.18 | 0.13 (0.03) | 19            | 2               |
| rs2112347  | 0.37 | 0.10 (0.02) | 19            | 2               |
| rs887912   | 0.29 | 0.10 (0.02) | 17            | 2               |
| rs3810291  | 0.33 | 0.09 (0.02) | 15            | 1               |
| rs13078807 | 0.2  | 0.10 (0.02) | 14            | 1               |
| rs4771122  | 0.24 | 0.09 (0.03) | 13            | 1               |
| rs2890652  | 0.18 | 0.09 (0.03) | 12            | 1               |
| rs1514175  | 0.43 | 0.07 (0.02) | 12            | 1               |
| rs4836133  | 0.48 | 0.07 (0.02) | 12            | 1               |
| rs11847697 | 0.04 | 0.17 (0.05) | 11            | 1               |
| rs3817334  | 0.41 | 0.06 (0.02) | 10            | 1               |
| rs29941    | 0.33 | 0.06 (0.02) | 10            | 1               |
| rs1555543  | 0.41 | 0.06 (0.02) | 10            | 1               |
| rs4929949  | 0.48 | 0.06 (0.02) | 10            | 1               |
| rs206936   | 0.21 | 0.06 (0.02) | 8             | <1              |

<sup>a</sup>Power calculations were performed using QUANTO (<http://hydra.usc.edu/GxE/>) based on i) minor allele frequencies (column 2) and effect sizes (column 3) for BMI (kg/m<sup>2</sup>) as reported for stage 2 analyses in Speliotes *et al*, *Nat Genet* 2010;42:937-48, ii) a sample size of 3852 (total sample size of current study) and iii) a population mean BMI (SD) of 25.5 (4) kg/m<sup>2</sup>.

Calculations assumed an additive model and alpha values of 0.05 (column 4, no correction of multiple testing) or 0.0016 (column 5, corrected for 32 tests).

**Supplementary Table 4 Characteristics of the study participants**

| Characteristic                         | Women       | Men         |
|----------------------------------------|-------------|-------------|
| N                                      | 2381        | 1471        |
| Age, years                             | 66.8 (6.5)  | 66.6 (7.8)  |
| BMI, kg/m                              | 25.9 (5.1)  | 25.6 (3.5)  |
| Energy intake, kcal                    | 1693 (472)  | 2057 (532)  |
| Carbohydrate intake, %energy           | 51.8 (8.1)  | 49.4 (8.2)  |
| Protein intake, %energy                | 17.3 (2.9)  | 16.8 (2.7)  |
| Total fat intake, %energy              | 30.6 (6.4)  | 31.4 (6.1)  |
| Saturated fat, %energy                 | 9.7 (2.7)   | 9.7 (2.5)   |
| Cereal fiber, g/d                      | 6.7 (2.7)   | 7.6 (3.2)   |
| Alcohol, g/d                           | 6.8 (10.6)  | 14.3 (16.0) |
| Physical activity, METs                | 19.1 (22.5) | 48.1 (52.6) |
| Current smoker, n (%)                  | 105 (4.4)   | 37 (2.5)    |
| Cognitive restraint score <sup>a</sup> | 14.7 (3.7)  | 14.3 (4.0)  |
| Uncontrolled eating score <sup>a</sup> | 15.0 (4.4)  | 14.2 (4.2)  |
| Emotional eating score <sup>a</sup>    | 5.7 (2.4)   | 4.5 (1.9)   |
| Obesity GRS                            | 28.6 (3.5)  | 28.5 (3.6)  |

Values are mean (SD) unless otherwise specified.

<sup>a</sup>Non-standardized eating behavior scores

**Supplementary Table 5 Association between Obesity-SNPs and current BMI in men and women<sup>a</sup>**

| SNP        | Closest Gene   | Women         |              | Men            |              | All          |              |
|------------|----------------|---------------|--------------|----------------|--------------|--------------|--------------|
|            |                | $\beta$ (SE)  | P            | $\beta$ (SE)   | P            | $\beta$ (SE) | P            |
| rs10150332 | <i>NRXN3</i>   | 0.02 (0.03)   | 0.54         | 0.02 (0.05)    | 0.69         | 0.02 (0.03)  | 0.47         |
| rs10767664 | <i>BDNF</i>    | 0.06 (0.03)   | 0.08         | 0.06 (0.04)    | 0.15         | 0.06 (0.03)  | <b>0.02</b>  |
| rs10938397 | <i>GNPDA2</i>  | 0.02 (0.03)   | 0.42         | 0.004 (0.04)   | 0.91         | 0.02 (0.02)  | 0.48         |
| rs10968576 | <i>LRRN6C</i>  | -0.01 (0.03)  | 0.73         | 0.04 (0.04)    | 0.34         | 0.01 (0.02)  | 0.74         |
| rs11847697 | <i>PRKD1</i>   | 0.04 (0.07)   | 0.59         | -0.10 (0.09)   | 0.27         | -0.01 (0.05) | 0.80         |
| rs12444979 | <i>GPRC5B</i>  | 0.11 (0.04)   | <b>0.006</b> | -0.0001 (0.05) | 0.99         | 0.07 (0.03)  | <b>0.03</b>  |
| rs13078807 | <i>CADM2</i>   | 0.005 (0.03)  | 0.91         | 0.03 (0.04)    | 0.46         | 0.01 (0.03)  | 0.59         |
| rs13107325 | <i>SLC39A8</i> | 0.01 (0.05)   | 0.92         | 0.22 (0.07)    | <b>0.001</b> | 0.09 (0.04)  | <b>0.03</b>  |
| rs1514175  | <i>TNNI3K</i>  | 0.01 (0.03)   | 0.82         | 0.01 (0.04)    | 0.78         | 0.01 (0.02)  | 0.72         |
| rs1555543  | <i>PTBP2</i>   | -0.04 (0.03)  | 0.12         | -0.01 (0.04)   | 0.70         | -0.03 (0.02) | 0.15         |
| rs1558902  | <i>FTO</i>     | 0.07 (0.03)   | <b>0.01</b>  | 0.06 (0.04)    | 0.10         | 0.07 (0.020) | <b>0.002</b> |
| rs206936   | <i>NUDT3</i>   | 0.005 (0.04)  | 0.90         | 0.05 (0.05)    | 0.28         | 0.02 (0.03)  | 0.44         |
| rs2112347  | <i>POC5</i>    | -0.01 (0.03)  | 0.76         | 0.08 (0.04)    | <b>0.03</b>  | 0.03 (0.02)  | 0.27         |
| rs2241423  | <i>MAP2K5</i>  | 0.01 (0.03)   | 0.86         | 0.02 (0.04)    | 0.70         | 0.01 (0.03)  | 0.70         |
| rs2287019  | <i>QPCTL</i>   | 0.06 (0.04)   | 0.11         | 0.05 (0.05)    | 0.33         | 0.06 (0.03)  | 0.06         |
| rs2815752  | <i>NEGR1</i>   | 0.06 (0.03)   | <b>0.04</b>  | 0.06 (0.04)    | 0.13         | 0.06 (0.02)  | <b>0.01</b>  |
| rs2867125  | <i>TMEM18</i>  | 0.05 (0.04)   | 0.15         | -0.01 (0.05)   | 0.78         | 0.03 (0.03)  | 0.34         |
| rs2890652  | <i>LRP1B</i>   | -0.03 (0.04)  | 0.44         | -0.07 (0.05)   | 0.14         | -0.05 (0.03) | 0.13         |
| rs29941    | <i>KCTD15</i>  | 0.01 (0.03)   | 0.69         | -0.002 (0.04)  | 0.95         | 0.01 (0.02)  | 0.79         |
| rs3810291  | <i>ZC3H4</i>   | 0.01 (0.03)   | 0.79         | 0.02 (0.04)    | 0.57         | 0.01 (0.02)  | 0.57         |
| rs3817334  | <i>MTCH2</i>   | 0.08 (0.03)   | <b>0.007</b> | 0.05 (0.04)    | 0.15         | 0.07 (0.02)  | <b>0.003</b> |
| rs4771122  | <i>MTIF3</i>   | 0.05 (0.03)   | 0.17         | 0.02 (0.05)    | 0.69         | 0.04 (0.03)  | 0.19         |
| rs4836133  | <i>ZNF608</i>  | 0.04 (0.03)   | 0.20         | -0.01 (0.04)   | 0.72         | 0.02 (0.02)  | 0.44         |
| rs4929949  | <i>STK33</i>   | 0.0001 (0.03) | 0.99         | -0.03 (0.04)   | 0.34         | -0.01 (0.02) | 0.56         |
| rs543874   | <i>SEC16B</i>  | 0.04 (0.04)   | 0.25         | 0.04 (0.05)    | 0.44         | 0.04 (0.03)  | 0.17         |
| rs571312   | <i>MC4R</i>    | 0.03 (0.03)   | 0.30         | -0.04 (0.04)   | 0.35         | 0.01 (0.03)  | 0.80         |
| rs713586   | <i>RBJ</i>     | 0.01 (0.03)   | 0.62         | 0.02 (0.04)    | 0.51         | 0.02 (0.02)  | 0.42         |
| rs7138803  | <i>FAIM2</i>   | 0.07 (0.03)   | <b>0.02</b>  | 0.05 (0.04)    | 0.21         | 0.06 (0.02)  | <b>0.008</b> |
| rs7359397  | <i>SH2B1</i>   | 0.05 (0.03)   | 0.10         | 0.01 (0.04)    | 0.78         | 0.03 (0.02)  | 0.14         |
| rs887912   | <i>FANCL</i>   | 0.09 (0.03)   | <b>0.005</b> | 0.04 (0.04)    | 0.32         | 0.07 (0.02)  | <b>0.005</b> |
| rs9816226  | <i>ETV5</i>    | 0.02 (0.04)   | 0.50         | 0.03 (0.05)    | 0.49         | 0.03 (0.03)  | 0.34         |
| rs987237   | <i>TFAP2B</i>  | -0.03 (0.04)  | 0.42         | 0.02 (0.05)    | 0.74         | -0.01 (0.03) | 0.67         |

<sup>a</sup>Results from regression analysis adjusted for age and GWAS-set

**Supplementary Table 6 Associations between confirmed obesity-SNPs and eating behavior scores<sup>a</sup>**

| Obesity Loci, SNP          | Women                          |       |                                |       | Men                            |      |                                |      | All                            |        |       |                                |        |       |
|----------------------------|--------------------------------|-------|--------------------------------|-------|--------------------------------|------|--------------------------------|------|--------------------------------|--------|-------|--------------------------------|--------|-------|
|                            | Model 1 <sup>b</sup><br>β (SE) | P     | Model 2 <sup>c</sup><br>β (SE) | P     | Model 1 <sup>b</sup><br>β (SE) | P    | Model 2 <sup>c</sup><br>β (SE) | P    | Model 1 <sup>d</sup><br>β (SE) | P      | P het | Model 2 <sup>d</sup><br>β (SE) | P      | P het |
| <b>Cognitive restraint</b> |                                |       |                                |       |                                |      |                                |      |                                |        |       |                                |        |       |
| Obesity GRS                | 0.004 (0.006)                  | 0.47  | 0.03 (0.006)                   | 0.66  | 0.009 (0.007)                  | 0.22 | 0.007 (0.007)                  | 0.31 | 0.006 (0.005)                  | 0.19   | 0.61  | 0.004 (0.005)                  | 0.33   | 0.61  |
| FTO, rs1558902             | 0.08 (0.03)                    | 0.005 | 0.08 (0.03)                    | 0.007 | 0.10 (0.04)                    | 0.01 | 0.09 (0.04)                    | 0.02 | 0.09 (0.02)                    | 0.0002 | 0.76  | 0.08 (0.02)                    | 0.0003 | 0.77  |
| LRP1B, rs2890652           | -0.09 (0.04)                   | 0.02  | -0.09 (0.04)                   | 0.03  | -0.06 (0.05)                   | 0.22 | -0.06 (0.05)                   | 0.26 | -0.08 (0.03)                   | 0.01   | 0.71  | -0.08 (0.03)                   | 0.01   | 0.67  |
| TFAP2B, rs987237           | -0.03 (0.04)                   | 0.37  | -0.03 (0.04)                   | 0.39  | -0.11 (0.05)                   | 0.02 | -0.11 (0.05)                   | 0.02 | -0.06 (0.03)                   | 0.03   | 0.19  | -0.06 (0.03)                   | 0.03   | 0.18  |
| <b>Emotional eating</b>    |                                |       |                                |       |                                |      |                                |      |                                |        |       |                                |        |       |
| Obesity GRS                | 0.02 (0.006)                   | 0.005 | 0.007 (0.005)                  | 0.22  | 0.007 (0.007)                  | 0.35 | 0.001 (0.007)                  | 0.86 | 0.01 (0.005)                   | 0.005  | 0.30  | 0.005 (0.004)                  | 0.28   | 0.55  |
| MTCH2, rs3817334           | 0.07 (0.03)                    | 0.02  | 0.04 (0.03)                    | 0.15  | 0.07 (0.04)                    | 0.05 | 0.06 (0.03)                    | 0.09 | 0.07 (0.02)                    | 0.002  | 0.91  | 0.05 (0.02)                    | 0.03   | 0.66  |
| TNNI3K, rs1514175          | 0.08 (0.03)                    | 0.004 | 0.08 (0.03)                    | 0.003 | 0.02 (0.04)                    | 0.60 | 0.02 (0.04)                    | 0.64 | 0.06 (0.02)                    | 0.01   | 0.17  | 0.06 (0.02)                    | 0.008  | 0.15  |
| FTO, rs1558902             | 0.05 (0.03)                    | 0.07  | 0.03 (0.03)                    | 0.31  | 0.06 (0.04)                    | 0.09 | 0.05 (0.03)                    | 0.19 | 0.06 (0.02)                    | 0.01   | 0.86  | 0.03 (0.02)                    | 0.11   | 0.67  |
| ZC3H4, rs3810291           | 0.06 (0.03)                    | 0.04  | 0.06 (0.03)                    | 0.04  | 0.05 (0.04)                    | 0.17 | 0.05 (0.04)                    | 0.20 | 0.06 (0.02)                    | 0.01   | 0.84  | 0.06 (0.02)                    | 0.01   | 0.79  |
| QPCTL, rs2287019           | -0.07 (0.04)                   | 0.09  | -0.09 (0.04)                   | 0.02  | -0.06 (0.05)                   | 0.22 | -0.07 (0.04)                   | 0.13 | -0.06 (0.03)                   | 0.04   | 0.88  | -0.08 (0.03)                   | 0.005  | 0.74  |
| <b>Uncontrolled eating</b> |                                |       |                                |       |                                |      |                                |      |                                |        |       |                                |        |       |
| Obesity GRS                | 0.01 (0.006)                   | 0.03  | 0.005 (0.006)                  | 0.41  | 0.02 (0.007)                   | 0.02 | 0.01 (0.007)                   | 0.13 | 0.01 (0.005)                   | 0.002  | 0.65  | 0.007 (0.004)                  | 0.12   | 0.51  |
| TNNI3K, rs1514175          | 0.08 (0.03)                    | 0.004 | 0.08 (0.03)                    | 0.003 | 0.02 (0.04)                    | 0.50 | 0.02 (0.04)                    | 0.54 | 0.06 (0.02)                    | 0.007  | 0.21  | 0.06 (0.02)                    | 0.007  | 0.18  |
| MTCH2, rs3817334           | 0.06 (0.03)                    | 0.04  | 0.04 (0.03)                    | 0.18  | 0.06 (0.04)                    | 0.08 | 0.05 (0.03)                    | 0.18 | 0.06 (0.02)                    | 0.007  | 0.95  | 0.04 (0.02)                    | 0.06   | 0.82  |
| FANCL, rs887912            | 0.08 (0.03)                    | 0.02  | 0.05 (0.03)                    | 0.09  | 0.03 (0.04)                    | 0.46 | 0.02 (0.04)                    | 0.64 | 0.06 (0.02)                    | 0.02   | 0.33  | 0.04 (0.02)                    | 0.11   | 0.48  |
| FTO, rs1558902             | 0.06 (0.03)                    | 0.05  | 0.03 (0.03)                    | 0.22  | 0.04 (0.04)                    | 0.29 | 0.02 (0.03)                    | 0.56 | 0.05 (0.02)                    | 0.03   | 0.72  | 0.03 (0.02)                    | 0.18   | 0.76  |
| FAIM2, rs7138803           | 0.07 (0.03)                    | 0.01  | 0.05 (0.03)                    | 0.07  | 0.01 (0.04)                    | 0.72 | -0.0008 (0.04)                 | 0.98 | 0.05 (0.02)                    | 0.03   | 0.21  | 0.03 (0.02)                    | 0.15   | 0.25  |
| ZC3H4, rs3810291           | 0.03 (0.03)                    | 0.38  | 0.02 (0.03)                    | 0.40  | 0.09 (0.04)                    | 0.02 | 0.09 (0.04)                    | 0.02 | 0.05 (0.02)                    | 0.03   | 0.20  | 0.05 (0.02)                    | 0.04   | 0.21  |

P het, P for between-gender heterogeneity, GRS for genetic risk score.

<sup>a</sup>Presented are results with P values <0.05 for the combined analysis of men and women for model 1. β (SE) correspond to changes in eating behavior Z-score for each additional BMI increasing allele (GRS) or allele (SNPs).

<sup>b</sup>Results from regression analysis adjusted for age and GWAS-set

<sup>c</sup>Results from regression analysis adjusted for age, GWAS-set and BMI

<sup>d</sup>Results from meta-analysis of men and women

**Supplementary Table 7 Association between obesity variants and eating style scores after restriction to non-obese participants<sup>a</sup>**

| Obesity Loci, SNP          | Women                          |       |                                |       | Men                            |       |                                |       | All                            |        |       |                                |        |       |
|----------------------------|--------------------------------|-------|--------------------------------|-------|--------------------------------|-------|--------------------------------|-------|--------------------------------|--------|-------|--------------------------------|--------|-------|
|                            | Model 1 <sup>b</sup><br>β (SE) | P     | Model 2 <sup>c</sup><br>β (SE) | P     | Model 1 <sup>b</sup><br>β (SE) | P     | Model 2 <sup>c</sup><br>β (SE) | P     | Model 1 <sup>d</sup><br>β (SE) | P      | P het | Model 2 <sup>d</sup><br>β (SE) | P      | P het |
| <b>Cognitive restraint</b> |                                |       |                                |       |                                |       |                                |       |                                |        |       |                                |        |       |
| Obesity GRS                | 0.003 (0.006)                  | 0.63  | 0.001 (0.006)                  | 0.81  | 0.01 (0.008)                   | 0.10  | 0.01 (0.008)                   | 0.18  | 0.007 (0.005)                  | 0.16   | 0.34  | 0.005 (0.005)                  | 0.30   | 0.37  |
| FTO, rs1558902             | 0.10 (0.03)                    | 0.002 | 0.09 (0.03)                    | 0.004 | 0.11(0.04)                     | 0.008 | 0.11 (0.04)                    | 0.009 | 0.11 (0.03)                    | 5.1e-5 | 0.87  | 0.10 (0.02)                    | 0.0001 | 0.80  |
| LRP1B, rs2890652           | -0.10 (0.04)                   | 0.02  | -0.09 (0.04)                   | 0.04  | -0.07(0.05)                    | 0.22  | -0.06 (0.05)                   | 0.25  | -0.08 (0.03)                   | 0.01   | 0.43  | -0.08 (0.03)                   | 0.02   | 0.70  |
| TFAP2B, rs987237           | -0.03 (0.04)                   | 0.43  | -0.03 (0.04)                   | 0.49  | -0.12 (0.05)                   | 0.02  | -0.11 (0.05)                   | 0.02  | -0.07 (0.03)                   | 0.03   | 0.19  | -0.06 (0.03)                   | 0.04   | 0.19  |
| <b>Emotional eating</b>    |                                |       |                                |       |                                |       |                                |       |                                |        |       |                                |        |       |
| Obesity GRS                | 0.01 (0.006)                   | 0.07  | 0.009 (0.006)                  | 0.15  | 0.007 (0.008)                  | 0.38  | 0.004 (0.008)                  | 0.64  | 0.01 (0.005)                   | 0.05   | 0.63  | 0.007 (0.005)                  | 0.15   | 0.59  |
| MTCH2, rs3817334           | 0.08 (0.03)                    | 0.01  | 0.04 (0.03)                    | 0.14  | 0.06 (0.04)                    | 0.12  | 0.06 (0.04)                    | 0.15  | 0.07 (0.02)                    | 0.002  | 0.72  | 0.05 (0.02)                    | 0.04   | 0.81  |
| TNN131K, rs1514175         | 0.07 (0.03)                    | 0.03  | 0.07 (0.03)                    | 0.02  | 0.06 (0.04)                    | 0.13  | 0.05 (0.04)                    | 0.17  | 0.07 (0.02)                    | 0.007  | 0.84  | 0.06 (0.02)                    | 0.009  | 0.78  |
| FTO, rs1558902             | 0.04 (0.03)                    | 0.18  | 0.03 (0.03)                    | 0.32  | 0.05 (0.04)                    | 0.19  | 0.05 (0.04)                    | 0.22  | 0.05 (0.02)                    | 0.06   | 0.86  | 0.04 (0.02)                    | 0.12   | 0.72  |
| ZC3H4, rs3810291           | 0.04 (0.03)                    | 0.21  | 0.04 (0.03)                    | 0.18  | 0.05 (0.04)                    | 0.29  | 0.04 (0.04)                    | 0.29  | 0.04 (0.03)                    | 0.10   | 0.96  | 0.04 (0.03)                    | 0.09   | 0.99  |
| QPCTL, rs2287019           | -0.08 (0.04)                   | 0.05  | -0.09 (0.04)                   | 0.02  | -0.06 (0.05)                   | 0.23  | -0.08 (0.05)                   | 0.13  | -0.07 (0.03)                   | 0.02   | 0.72  | -0.09 (0.03)                   | 0.007  | 0.79  |
| <b>Uncontrolled eating</b> |                                |       |                                |       |                                |       |                                |       |                                |        |       |                                |        |       |
| Obesity GRS                | 0.006 (0.006)                  | 0.35  | 0.004 (0.006)                  | 0.56  | 0.01 (0.008)                   | 0.06  | 0.01 (0.008)                   | 0.16  | 0.01 (0.005)                   | 0.05   | 0.39  | 0.006 (0.005)                  | 0.18   | 0.48  |
| TNN131K, rs1514175         | 0.08 (0.03)                    | 0.01  | 0.08 (0.03)                    | 0.01  | 0.04 (0.04)                    | 0.33  | 0.03 (0.04)                    | 0.43  | 0.07 (0.02)                    | 0.01   | 0.38  | 0.06 (0.02)                    | 0.01   | 0.30  |
| MTCH2, rs3817334           | 0.07 (0.03)                    | 0.02  | 0.04 (0.03)                    | 0.17  | 0.06 (0.04)                    | 0.16  | 0.05 (0.04)                    | 0.23  | 0.07 (0.02)                    | 0.01   | 0.72  | 0.04 (0.02)                    | 0.07   | 0.94  |
| FANCL, rs887912            | 0.08 (0.04)                    | 0.02  | 0.08 (0.03)                    | 0.03  | 0.04 (0.04)                    | 0.33  | 0.04 (0.04)                    | 0.35  | 0.07 (0.03)                    | 0.01   | 0.41  | 0.06 (0.03)                    | 0.02   | 0.47  |
| FTO, rs1558902             | 0.04 (0.03)                    | 0.17  | 0.03 (0.03)                    | 0.28  | 0.05 (0.04)                    | 0.23  | 0.04 (0.04)                    | 0.26  | 0.05 (0.03)                    | 0.07   | 0.94  | 0.04 (0.02)                    | 0.12   | 0.84  |
| FAIM2, rs7138803           | 0.07 (0.03)                    | 0.04  | 0.05 (0.03)                    | 0.11  | 0.04 (0.04)                    | 0.35  | 0.02 (0.04)                    | 0.61  | 0.06 (0.03)                    | 0.03   | 0.56  | 0.04 (0.02)                    | 0.12   | 0.54  |
| ZC3H4, rs3810291           | 0.01 (0.03)                    | 0.77  | 0.01 (0.03)                    | 0.74  | 0.08 (0.04)                    | 0.08  | 0.07 (0.04)                    | 0.07  | 0.04 (0.03)                    | 0.18   | 0.23  | 0.04 (0.03)                    | 0.17   | 0.23  |

P het- P for between-gender heterogeneity, GRS for genetic risk score

<sup>a</sup> Presented are corresponding results presented in Table 2 after restricting to non-obese participants. β (SE) correspond to changes in eating behavior Z-score for each additional BMI increasing allele (GRS) or allele (SNPs).

<sup>b</sup> Results from regression analysis adjusted for age and GWAS-set

<sup>c</sup> Results from regression analysis adjusted for age, GWAS-set and BMI

<sup>d</sup> Results from meta-analysis of men and women.
